# Supplementary material for: Evolution of complex genome architecture in gymnosperms
Source: PubMed Central journal article supplement (PMC9364684; doi:10.1093/gigascience/giac078), 2022-08-10
Supplement: giac078_authors_response_to_reviewer_comments.pdf [file giac078_authors_response_to_reviewer_comments.pdf]

## Author's Response To Reviewer Comments

Close

- 1.The title and the abstract have been substantially revised and the text has been polished again by another native speaker (Dr. Ruth from UK).
- 2.All web links and URLs in main text have been given a reference number and included in the reference list.
- 3.We have updated all the links in Table 1 to make the data be easily accessed by readers.

Close
